# Supplementary material for: Population and Landscape Genetics of an Introduced Species (M. fascicularis) on the Island of Mauritius
Source: PLoS One. 2013 Jan 14;8(1):e53001. doi: 10.1371/journal.pone.0053001 (PMC3544817; doi:10.1371/journal.pone.0053001)
Supplement: Table S1 — Observed and expected heterozygosity values for each of the sampling sites. (XLSX) [file pone.0053001.s001.xlsx]

## Sheet: Table 2
	1		2		3		4		5		6		7		8		9		10		11		12		13		14
LOCUS	Expected	Observed	Expected	Observed	Expected	Observed	Expected	Observed	Expected	Observed	Expected	Observed	Expected	Observed	Expected	Observed	Expected	Observed	Expected	Observed	Expected	Observed	Expected	Observed	Expected	Observed	Expected	Observed
D1s548	0.18	0.2	0	0	0.452909	0.473684	0.357853	0.407407	0.429752	0.363636	0.571111	0.6	0.514757	0.5	0.480796	0.444444	0.44898	0.428571	0.5	1	0.599174	0.636364	0.56	0.6	0	0	0.423875	0.470588
D5s1457	0.42	0.6	0.5	1	0.498615	0.421053	0.474108	0.481481	0.375	0.333333	0.444444	0.533333	0.4488	0.48	0.477041	0.5	0.357778	0.466667	0.5	1	0.492188	0.6875	0.32	0.4	0.375	0.5	0.622837	0.705882
D6s501	0.54	0.4	0	0	0.613573	0.526316	0.632545	0.574074	0.392361	0.333333	0.524444	0.533333	0.4296	0.4	0.639668	0.714286	0.668889	0.533333	0.5	1	0.549587	0.606061	0.56	0.6	0.375	0.5	0.641869	0.705882
D7s794	0.7	0.8	0	0	0.65651	0.684211	0.722263	0.711538	0.569444	0.666667	0.637778	0.533333	0.609375	0.5	0.64952	0.814815	0.744444	0.733333	0.5	1	0.723725	0.677419	0.58	0.8	0.375	0.5	0.657439	0.647059
D7s1826	0.66	0.4	0	0	0.605263	0.736842	0.670118	0.75	0.615702	0.636364	0.526667	0.466667	0.5344	0.56	0.492985	0.535714	0.495556	0.4	0	0	0.569824	0.5625	0.46	0.6	0.625	1	0.224609	0.25
D8s1106	0.42	0.2	0.75	1	0.707756	0.736842	0.749314	0.703704	0.704861	0.666667	0.622222	0.266667	0.6472	0.68	0.751276	0.714286	0.72449	0.714286	0.5	1	0.721304	0.727273	0.62	0.6	0.625	1	0.704152	0.882353
D8s1466	0.42	0.6	0	0	0.461219	0.526316	0.521091	0.425926	0.329861	0.416667	0.391111	0.266667	0.525174	0.458333	0.282526	0.25	0.604444	0.733333	0	0	0.418274	0.515152	0.18	0.2	0.375	0.5	0.512755	0.571429
D9s921	0.56	0.4	0.625	0.5	0.790657	0.882353	0.809357	0.653846	0.791667	0.833333	0.764444	0.8	0.7392	0.72	0.811385	0.592593	0.795918	0.714286	0.5	1	0.748535	0.65625	0.625	0.75	0.625	1	0.737024	0.764706
D13s765	0.375	0.5	0.375	0.5	0.606481	0.555556	0.614988	0.433962	0.46875	0.5	0.576923	0.461538	0.554688	0.5	0.537628	0.428571	0.491111	0.2	0.5	1	0.568871	0.575758	0.62	0.2	0.5	1	0.607422	0.625
D3s1768	0.74	0.2	0	0	0.721607	0.315789	0.766465	0.226415	0.520833	0.333333	0.604444	0	0.6344	0.12	0.727023	0.333333	0.57398	0.142857	0	0	0.733091	0.225806	0.56	0	0.5	0	0.779297	0.25
D4s1626	0.5	0.5	0.625	1	0.674383	0.666667	0.642751	0.673077	0.642361	0.75	0.58	0.666667	0.6536	0.68	0.580729	0.583333	0.566667	0.733333	0.5	1	0.63916	0.5625	0.66	0.8	0.625	0.5	0.600346	0.705882
D4s2365	0.34	0.4	0.5	0	0.666205	0.578947	0.582414	0.509434	0.520833	0.5	0.664444	0.8	0.622396	0.541667	0.694515	0.571429	0.734694	0.857143	0.5	1	0.682736	0.69697	0.59375	0.5	0.5	1	0.638408	0.647059
D11s1975	0.46	0.6	0.375	0.5	0.666205	0.578947	0.670701	0.509434	0.625	0.5	0.646667	0.733333	0.5704	0.48	0.51977	0.428571	0.651111	0.6	0.5	1	0.657025	0.545455	0.66	0.4	0.375	0.5	0.562284	0.588235
D11s2002	0.66	0.8	0.5	1	0.644044	0.578947	0.691358	0.685185	0.40625	0.5	0.673611	0.75	0.65191	0.666667	0.639053	0.692308	0.544379	0.538462	0	0	0.568359	0.59375	0.7	0.6	0	0	0.623047	0.5
27Oe8	0.54	0.8	0.375	0.5	0.696676	0.736842	0.646605	0.722222	0.586806	0.5	0.671111	0.8	0.7112	0.8	0.606505	0.642857	0.611111	0.6	0.5	1	0.652433	0.69697	0.46	0.6	0.5	1	0.595156	0.529412
270o7	0.64	0.8	0	0	0.641274	0.526316	0.659578	0.403846	0.663194	0.25	0.72	0.933333	0.6856	0.4	0.592474	0.392857	0.686667	0.533333	0	0	0.560354	0.483871	0.62	0.4	0.75	1	0.614187	0.529412
271j8	0.74	0.8	0.625	0.5	0.756233	0.578947	0.811226	0.745098	0.801653	0.909091	0.671111	0.666667	0.7896	0.84	0.794239	0.777778	0.78	0.8	0.5	1	0.796387	0.84375	0.65625	0.75	0.5	0	0.728374	0.823529
D2s2952	0.375	0	0.625	0.5	0.754848	0.157895	0.713955	0.320755	0.722222	0.25	0.795556	0.533333	0.7328	0.44	0.784439	0.357143	0.737778	0.466667	0	0	0.828742	0.484848	0.71875	0.5	0.625	0.5	0.83564	0.705882
D10s1432	0.18	0.2	0.375	0.5	0.212803	0.117647	0.430658	0.365385	0.318182	0.272727	0.18	0.2	0.1832	0.12	0.274872	0.285714	0.435556	0.4	0.5	1	0.454086	0.424242	0.32	0.4	0	0	0.16436	0.176471
AGAT007	0.62	0.6	0.625	0.5	0.698061	0.631579	0.679067	0.735849	0.555556	0.583333	0.637778	0.866667	0.7296	0.72	0.708505	0.851852	0.62	0.866667	0.5	1	0.630859	0.65625	0.54	0.8	0.625	1	0.733564	0.647059
D9s934	0.66	0.4	0.625	0.5	0.606648	0.842105	0.677126	0.666667	0.548611	0.583333	0.715556	0.8	0.7408	0.72	0.713306	0.814815	0.704444	0.666667	0.5	1	0.735078	0.787879	0.56	0.6	0.375	0.5	0.695502	0.705882
D19s255	0	0	0	0	0.432133	0	0.430473	0	0.495868	0	0.124444	0	0.225694	0	0.252551	0	0	0	0	0	0.353516	0	0.32	0	0.5	0	0.415225	0
D14s306	0.8	0.8	0.5	1	0.865052	0.705882	0.714341	0.666667	0.73	0.6	0.678571	0.428571	0.788194	0.583333	0.805556	0.666667	0.748889	0.733333	1	NaN	0.837693	0.793103	0.76	0.8	0.75	1	0.769896	0.705882
D16s750	0.5	0.6	0.5	1	0.49446	0.578947	0.499815	0.442308	0.46875	0.25	0.391111	0.4	0.4992	0.72	0.493827	0.444444	0.464444	0.466667	0.5	1	0.497919	0.548387	0.42	0.6	0.375	0.5	0.49308	0.411765
272o12	0.42	0.6	0.5	1	0.294753	0.277778	0.319787	0.333333	0.444444	0.5	0.357778	0.333333	0.344618	0.333333	0.0713306	0.0740741	0.310651	0.230769	0	0	0.21875	0.25	0.34	0.4	0	0	0.261246	0.235294
267o11	0.74	0.8	0.5	1	0.811634	0.789474	0.820266	0.807692	0.640496	0.454545	0.69898	0.714286	0.825521	0.791667	0.670782	0.666667	0.840278	0.75	0.5	1	0.805213	0.666667	0.72	0.4	0.625	1	0.799308	0.764706
D18s537	0.42	0.2	0	0	0.65917	0.352941	0.636834	0.365385	0.375	0.333333	0.653846	0.307692	0.590703	0.238095	0.611607	0.535714	0.624444	0.333333	0	0	0.664062	0.40625	0.56	0.4	0.5	1	0.662109	0.4375
D18s536	0	0	0	0	0.380886	0.368421	0.340021	0.296296	0.434028	0.5	0.244444	0.266667	0.193576	0.125	0.34949	0.214286	0.35503	0.307692	0	0	0.231111	0.266667	0.34	0.4	0	0	0.455017	0.588235
